# Supplementary material for: FZP determines grain size and sterile lemma fate in rice
Source: PubMed Central journal article supplement (PMC6137974; doi:10.1093/jxb/ery264), 2018-07-19
Supplement: ery264_suppl_supplementary_material.pdf [file ery264_suppl_supplementary_material.pdf]

## SUPPLEMENTAL FIGURES

### Supplemental Figure 1

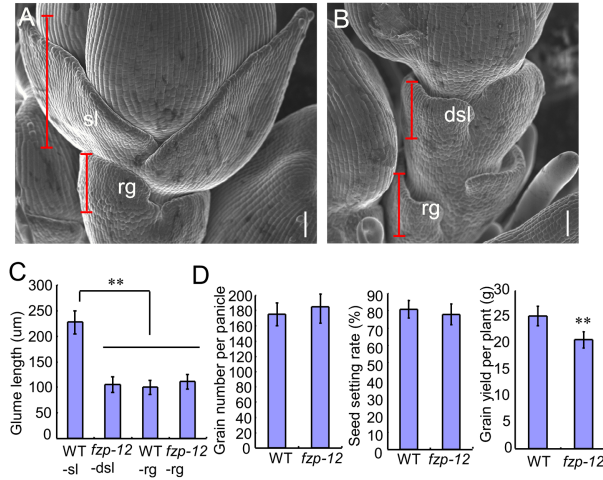

**Supplemental Figure 1.** A, wild type spikelet at Sp8 stage. B, *fpz-12* spikelet at Sp8 stage. C, length of the sterile lemma, degenerated sterile lemma, rudimentary glume in the wild type and *fpz-12* mutant. D, grain number per panicle, seed setting rate, and grain yield per plant in the wild type and *fpz-12* mutant. rg, rudimentary glume; sl, sterile lemma; dsl, degenerated sterile lemma. Red lines indicate the organ length. Bars = 50 µm. \*\*Significant difference at  $P < 0.01$  compared with the wild type by Student's *t*-test.

### Supplemental Figure 2

```

1                                     60
FZP      MNRTRGSGSSSSSSSSQASLMAFSEPPKSPASQSPSPSSPMSEPPSGRSRRRAQEPGRFLG
fzp-12   MNRTRGSGSSSSSSSSQASLMAFSEPPKSPASQSPSPSSPMSEPPSGRSRRRAQEPGRFLG
fzp-13   MNRTRGSGSSSSSSSSQASLMAFSEPPKSPASQSPSPSSPMSEPPSGRSRRRAQEPGRFLG
61                                     120
FZP      VRRRPWGRYAAEIRDFTTKERHWLGTFDTAQEAAALAYDRAALSMKGAQARTNFVYTHAAY
fzp-12   VRRRPWGRYAAEIRDFTTKERHWLGTFDTTQEAAALAYDRAALSMKGAQARTNFVYTHAAY
fzp-13   VRRRPWGRYAAEIRDSFTTKERHWLGTFDTAQEAAALAYDRAALSMKGAQARTNFVYTHAAY
121                                     180
FZP      NYPPFLAPFHAPQYAAAAAAPSSVQYGGGVGAAPHIGSYGHHHHHHHHGHGAASGASSV
fzp-12   NYPPFLAPFHAPQYAAAAAAPSSVQYGGGVGAAPHIGSYGHHHHHHHHHHGHGAASGASSV
fzp-13   NYPPFLAPFHAPQYAAAAAAPSSVQYGGGVGAAPHIGSYGHHHHHHHHHHGHGAASGASSV
181                                     240
FZP      GECSTMPVMVPVDPHRSSMSSSLDMDRNGHDFLFSGADDNSGYLSSVVPESCLRPRGGG
fzp-12   GECSTMPVMVPVDPHRSSMSSSLDMDRNGHDFLFSGADDNSGYLSSVVPESCLRPRGGG
fzp-13   GECSTMPVMVPVDPHRSSMSSSLDMDRNGHDFLFSGADDNSGYLSSVVPESCLRPRGGG
241                                     300
FZP      AAADHQDMRRYSADADAYGMMGLREDVDDLAQMVAGFWGGGDAADQLGACGFPASGGADM
fzp-12   AAADHQDMRRYSADADAYGMMGLREDVDDLAQMVAGFWGGGDAADQLGACGFPASGGADM
fzp-13   AAADHQDMRRYSADADAYGMMGLREDVDDLAQMVAGFWGGGDAADQLGACGFPASGGADM
301                                     318
FZP      VASSQGSDSYSPFSFLSH
fzp-12   VASSQGSDSYSPFSFLSH
fzp-13   VASSQGSDSYSPFSFLSH

```

**Supplemental Figure 2.** Protein sequence alignment of FZP, *fpz-12*, and *fpz-13*. Red

arrows indicate the mutated sites in the *fzp-12* and *fzp-13* mutants. *fzp-13* indicates the Cas9 knock-out plant.

### Supplemental Figure 3

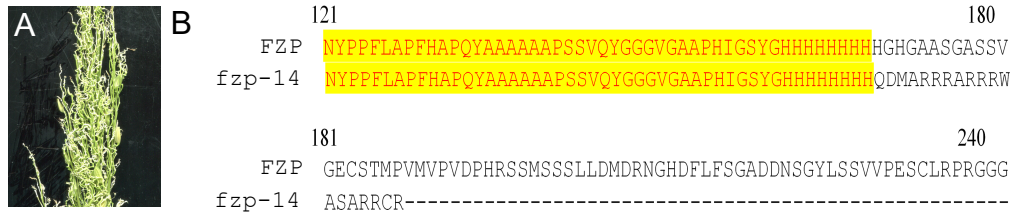

**Supplemental Figure 3.** *fzp-14* mutant and protein sequence alignment of FZP and *fzp-14*. **A**, *fzp-14* mutant. **B**, protein sequence alignment of FZP and *fzp-14*. *fzp-14* indicates the Cas9 knock-out plant.

### Supplemental Figure 4

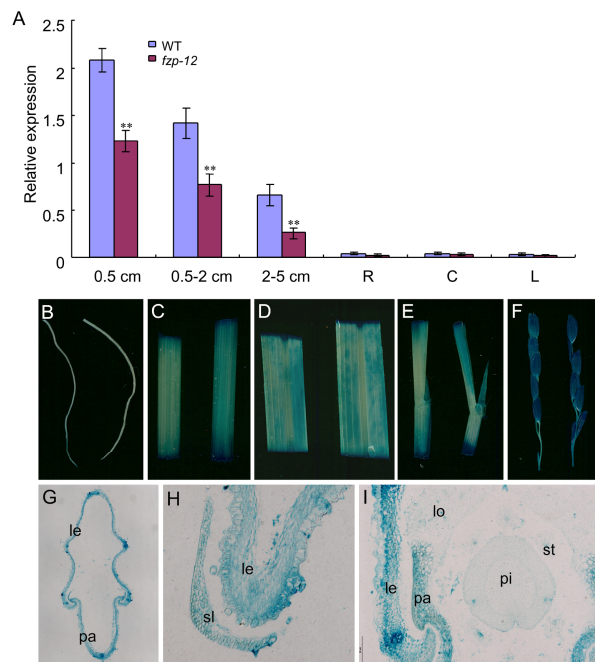

**Supplemental Figure 4.** **A**, *FZP* expression in different tissues as detected by qPCR. **B**, GUS staining of root. **C**, GUS staining of culm. **D**, GUS staining of leaf. **E**, GUS staining of leaf sheath. **F**, GUS staining of spikelet. R, root; C, culm; L, leaf. **G-I**, Cross-section of the stained spikelets. **G**, Cross-section of hull. **H**, Cross-section of sterile lemma. **I**, Cross-section of inner floral organs. 0.5, young panicles ( $\leq 0.5$  cm);

0.5-2, young panicles (0.5-2 cm); 2-5, young panicles (2-5 cm). le, lemma; pa, palea; sl, sterile lemma; st, stamen; pi, pistil. Error bars indicate SD. \*\*Significant difference at  $P < 0.01$  compared with the wild type by Student's  $t$ -test.

### Supplemental Figure 5

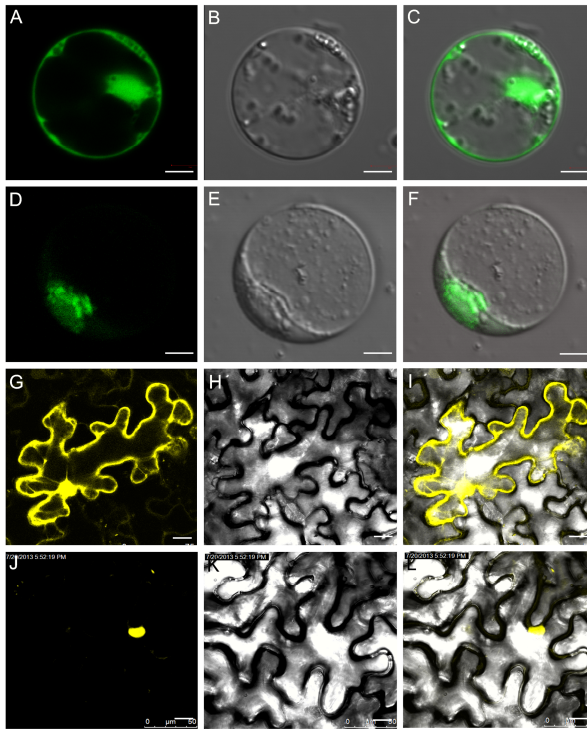

**Supplemental Figure 5.** Subcellular localization of the FZP protein. A-C, single GFP protein in rice protoplasts. D-F, FZP-GFP in rice protoplasts. G-I, single YFP protein in tobacco (*Nicotiana tabacum*) epidermal cells. J-L, FZP-YFP in tobacco (*Nicotiana tabacum*) epidermal cells. Bars = 5  $\mu$ m in A-F; 10 $\mu$ m in G-L.

## Supplemental Figure 6

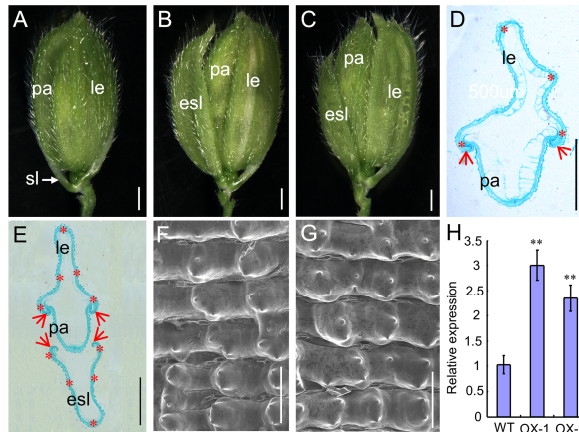

**Supplemental Figure 6.** A, wild type spikelet. B, spikelet in the *FZP* over-expressing line 1. C, spikelet in the *FZP* over-expressing line 2. D, histological analysis of wild type spikelet. E, histological analysis of spikelet in the *FZP* over-expressing plant. F, epidermal surface of the lemma in the wild type. G, epidermal surface of the sterile lemma in the *FZP* over-expressing plant. H, *FZP* expression analysis in the wild type and *FZP* over-expressing plants. esl, enlarged sterile lemma; sl, sterile lemma; le, lemma; pa, palea. Red stars indicate the vascular bundle. Red arrows indicate the inward hook-like structure. Error bars indicate SD. \*\*Significant difference at  $P < 0.01$  compared with the wild type by Student's *t*-test. Bars = 1000  $\mu\text{m}$  in A-C; 500 $\mu\text{m}$  in D and E; 100 $\mu\text{m}$  in F and G.

## Supplemental Figure 7

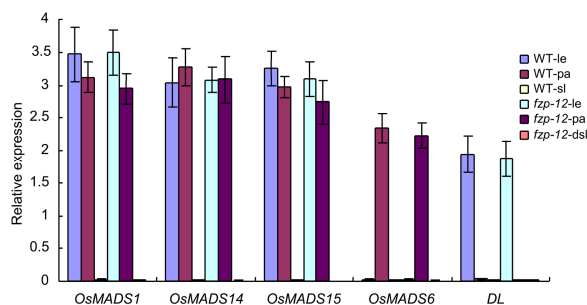

**Supplemental Figure 7.** Expression of floral organ identity genes in the wild type and *fpz-12* mutant. le, lemma; pa, palea; sl, sterile lemma; dsl, degenerated sterile lemma.

## Supplemental Figure 8

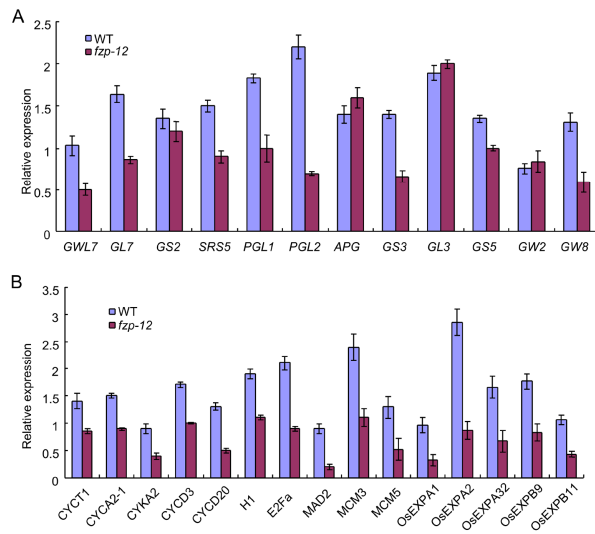

**Supplemental Figure 8.** Expression levels of related genes in wild-type and *fpz-12* mutant. A, Expression analysis of related genes influencing grain size in young panicles. B, Expression analysis of cell proliferation and expansion-related genes in young panicles. Error bars indicate SD. \*\*Significant difference at  $P < 0.01$  compared with the wild type by Student's *t*-test.

## Supplemental Figure 9. Protein sequence alignment of AP2/ERF genes.

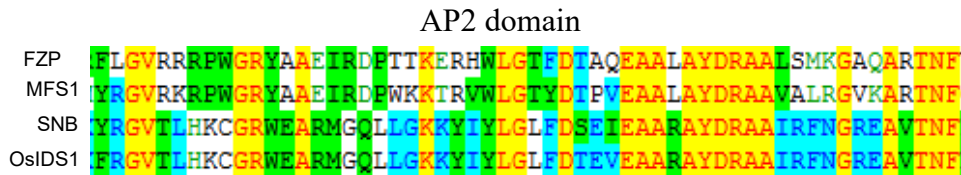

## Supplemental Tables

### Supplemental Table 1

| Cross combination  | F1        |               | F2        |               | $\chi^2$ (3:1) | P-value |
|--------------------|-----------|---------------|-----------|---------------|----------------|---------|
|                    | Wild type | <i>fpz-12</i> | Wild type | <i>fpz-12</i> |                |         |
| <i>fpz-12</i> /NJ6 | 57        | 0             | 3612      | 1189          | 0.1406         | 0.7707  |
| NJ6/ <i>fpz-12</i> | 48        | 0             | 3025      | 1043          | 0.8863         | 0.3465  |

**Supplemental Table 1.** Genetic analysis of the mutant phenotypes of *fpz-12*.

### Supplemental Table 2. Primers used in the study.

| Purpose | Primer name | Sequence |
|---------|-------------|----------|
|---------|-------------|----------|

|                       |                       |                                                   |                           |
|-----------------------|-----------------------|---------------------------------------------------|---------------------------|
| Mapping               | B7-13-1F              | ACAGTATCCAAGGCCCTGG                               |                           |
|                       | B7-13-1R              | CACGTGAGACAAAGACGGAG                              |                           |
|                       | A7-29-1F              | AGTTTTCTTTCTTTTCTAC                               |                           |
|                       | A7-29-1R              | CCTCAGCATGATACCCAC                                |                           |
|                       | A7-33-1F              | GCCCAAGATTATGAGA                                  |                           |
|                       | A7-33-1R              | AAGCTCCGACAATACA                                  |                           |
|                       | A7-3-1F               | GAGTTCAAGGAAGCACAAAA                              |                           |
|                       | A7-3-1R               | CAATGAGACTGTTGCTAACC                              |                           |
|                       | A7-9-1F               | TGAGGAGGAGGAGATGGTCG                              |                           |
|                       | A7-9-1R               | AGGTGCCCTTTGCAGTTTGA                              |                           |
|                       | A7-13-1F              | TGCTACAAGTACGTGCTTTT                              |                           |
|                       | A7-13-1R              | GTGGTTGGAGGCGATTTTAT                              |                           |
|                       | A7-25-1F              | TGCGTGGTGCAGCATTTGTA                              |                           |
|                       | A7-25-1R              | GGCATCACATTGAGCAAGAAA                             |                           |
|                       | A7-26-1F              | ACGTGCTTTTCTTGTACCTT                              |                           |
|                       | A7-26-1R              | TTTGTGGTTGGAGGCGATTT                              |                           |
|                       | S2-1F                 | CCTTAAGCTTGCATGGAG                                |                           |
|                       | S2-1R                 | GGTGGCCGGTGA AAAAGT                               |                           |
|                       | S14-1F                | GAGCTTTGCCTACAAGG                                 |                           |
|                       | S14-1R                | CGGGGAACAATGTAACAC                                |                           |
|                       | qRT-PCR               | <i>FZP</i> -1F                                    | GCATGGCTAATCACGCACTTT     |
|                       |                       | <i>FZP</i> -1R                                    | CCAAGCCACTCTTCTTGTTCG     |
|                       |                       | <i>OsMADS1</i> -1F                                |                           |
| <i>OsMADS1</i> -1R    |                       | TGATGGTGAGCATGAGGGTG                              |                           |
| <i>OsMADS14</i> -1F   |                       | CCATTAACGAGCTTCAACGG                              |                           |
| <i>OsMADS14</i> -1R   |                       | TGGTATGGATCTGAAGCCTCC                             |                           |
| <i>OsMADS15</i> -1F   |                       | AGTACGCCACTGACTCCAGG                              |                           |
| <i>OsMADS15</i> -1R   |                       | TGCTGGCCCCCTCACATTC                               |                           |
| <i>OsMADS6</i> -1F    |                       | CCAACAATGCACTTTCTGAAAC                            |                           |
| <i>OsMADS6</i> -1R    |                       | GGAGGCTTGTGTCATGGC                                |                           |
| <i>DL</i> -1F         |                       | CCCATCTGCTTACAACCGCTT                             |                           |
| <i>DL</i> -1R         |                       | GTTGGAGGTGGAAACCGTCG                              |                           |
| <i>G1</i> -1F         |                       | GGCGTCTACTTGCCATTTCTG                             |                           |
| <i>G1</i> -1R         |                       | TCGATCAGCATCAAAGCACAG                             |                           |
| <i>ACTIN</i> -1F      |                       | AGCAACTGGGATGATATGGA                              |                           |
| <i>ACTIN</i> -1R      |                       | CAGGGCGATGTAGGAAAGC                               |                           |
| GUS staining          |                       | pro <i>FZP</i> -GUS-1F                            | CAAGAGGAATTAACAGTGCTAATTC |
|                       | pro <i>FZP</i> GUS-1R | GTGTTTATGACCAATGCAATATTG                          |                           |
| In Situ Hybridization | <i>G1H</i> -1F        | CGCCTACGACGAGCGTCA                                |                           |
|                       | <i>G1SP6</i> -1R      | AGATTTAGGTGACACTATAGAAAGCAAC<br>CACAGTGAGAAGCACAG |                           |
|                       | <i>DLH</i> -1F        | GGGCCGCAATGGATCTCGTG                              |                           |
|                       | <i>DL SP6</i> -1R     | AGATTTAGGTGACACTATAGAATCACAA                      |                           |

|                              |                   |                                                       |
|------------------------------|-------------------|-------------------------------------------------------|
|                              |                   | CGAAGGGTGCTCT                                         |
| Complementation test         | <i>FZP</i> com-1F | CAAGAGGAATTAACAGTGCTAATTC                             |
|                              | <i>FZP</i> com-1R | CCACCACCTGCGTGTTATATG                                 |
|                              | <i>FZPOE</i> -1 F | ATGAACACTCGAGGCAGCGG                                  |
|                              | <i>FZPOE</i> -1 R | TCAATGGGAGAGGAAGCTGAATG                               |
| Over-expressing              | <i>FZPOE</i> -1F  | ATGAACACTCGAGGCAGCGG                                  |
|                              | <i>FZPOE</i> -1R  | TCAATGGGAGAGGAAGCTGAATG                               |
| EMSA probe<br>(specific)     | GCC-1F            | CATAAGAGCCGCCACTCATAAGAGCCGCC<br>ACTCATAAGAGCCGCCACT  |
|                              | GCC-1R            | GTATTCTCGGCGGTGAGTATTCTCGGCGG<br>TGAGTATTCTCGGCGGTGA  |
| EMSA probe<br>(non-specific) | GCC-2F            | CATAAGATACTTGACTCATAAGATACTTGA<br>CTCATAAGATACTTGACT  |
|                              | GCC-2R            | GTATTCTATGAACTGAGTATTCTATGAACT<br>GAGTATTCTATGAACTGA  |
| EMSA probe<br>(specific)     | DRE-1F            | ATACTACCGACATGAGATACTACCGACAT<br>GAG ATACTACCGACATGAG |
|                              | DRE-1R            | TATGATGGCTGTACTCTATGATGGCTGTAC<br>TCTATGATGGCTGTACTC  |
| EMSA probe<br>(non-specific) | DRE-2F            | ATACGTCTTTGACGAGATACGTCTTTGAC<br>GAGATACGTCTTTGACGAG  |
|                              | DRE-2R            | TATGCAGAACTGCTCTATGCAGAACTG<br>CTC TATGCAGAACTGCTC    |

---
